# Supplementary material
Source: Springer Nature journal article supplement (https://www.springermedizin.de/resource/supplementary/12943_2012_1031_MOESM3_ESM.pdf/9552130)

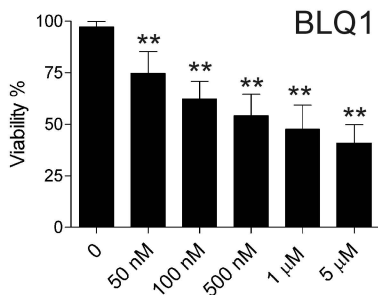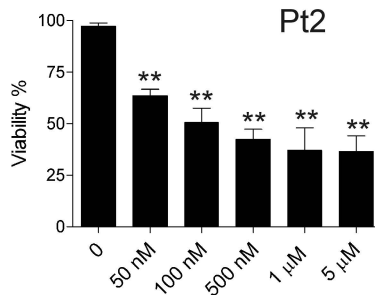

Ph+ ALL  
T315I mutation

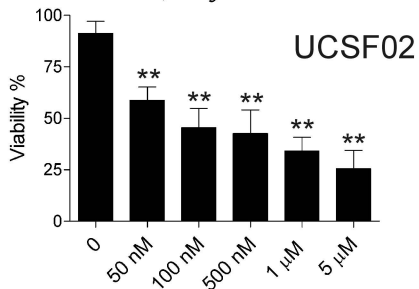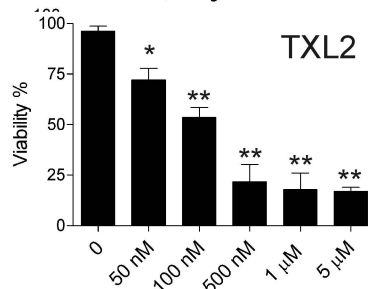

Ph+ ALL  
no mutation

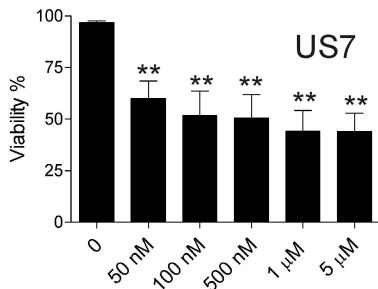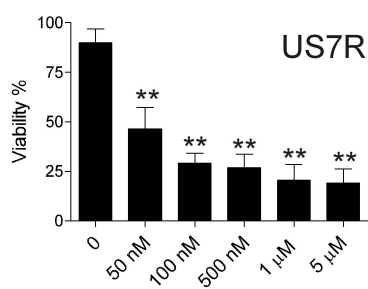

Ph- ALL

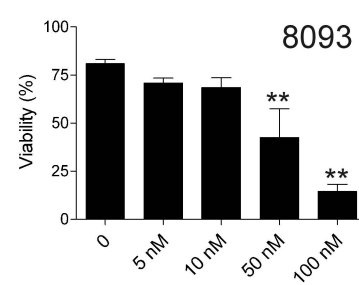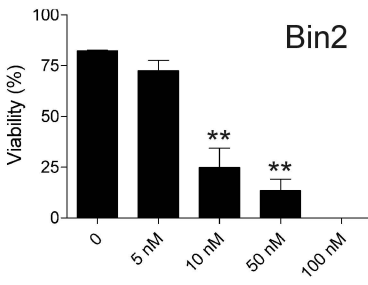

Mouse Bcr/Abi+  
ALL

Supplement: MOESM3 [file 9552130]
